# Supplementary material
Source: Springer Nature journal article supplement (https://www.springermedizin.de/resource/supplementary/12889_2011_3875_MOESM1_ESM.pdf/9490448)

# Person-Item Threshold Distribution

(Grouping Set to Interval Length of 0,20 making 35 Groups)

PERSONS

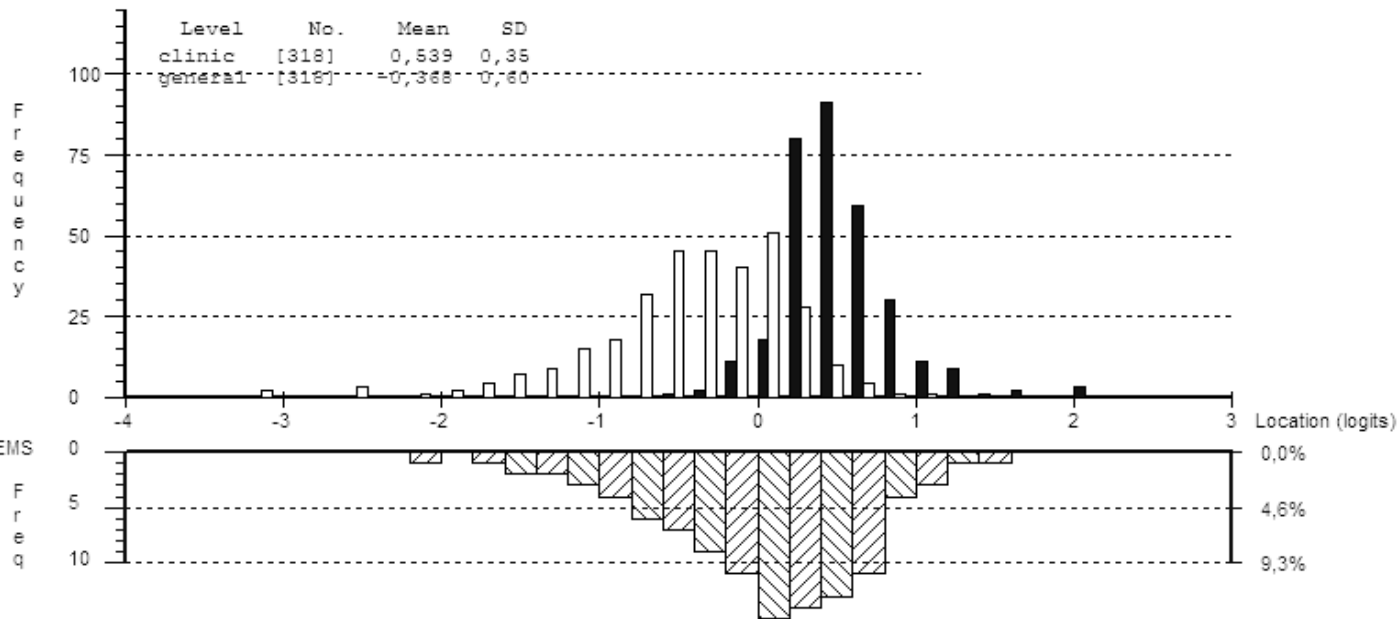

Supplement: MOESM1 [file 9490448]
